# Supplementary material for: Spatial scale of tuberculosis transmission in Lima, Peru
Source: PubMed Central journal article supplement — Proc Natl Acad Sci U S A. 2022 Nov 2;119(45):e2207022119. doi: 10.1073/pnas.2207022119 (PMC9659349; doi:10.1073/pnas.2207022119), 2022-11-02
Supplement: pnas.2207022119.sapp.pdf [file pnas.2207022119.sapp.pdf]

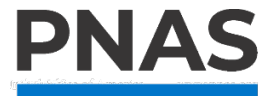

## **Supporting Information for**

Spatial Scale of Tuberculosis transmission in Lima, Peru

### **Authors:**

Chuan-Chin Huang, Letizia Trevisi, Mercedes C. Becerra, Roger I. Calderón, Carmen C. Contreras, Judith Jimenez, Leonid W. Lecca, Rosa M. Yataco, Zibiao Zhang, Megan B. Murray

**Corresponding Author:** Megan B. Murray

**Email:** [megan.murray.epi@gmail.com](mailto:megan.murray.epi@gmail.com)

### **This PDF file includes:**

Figures S1 to S3

Tables S1 to S2

A.

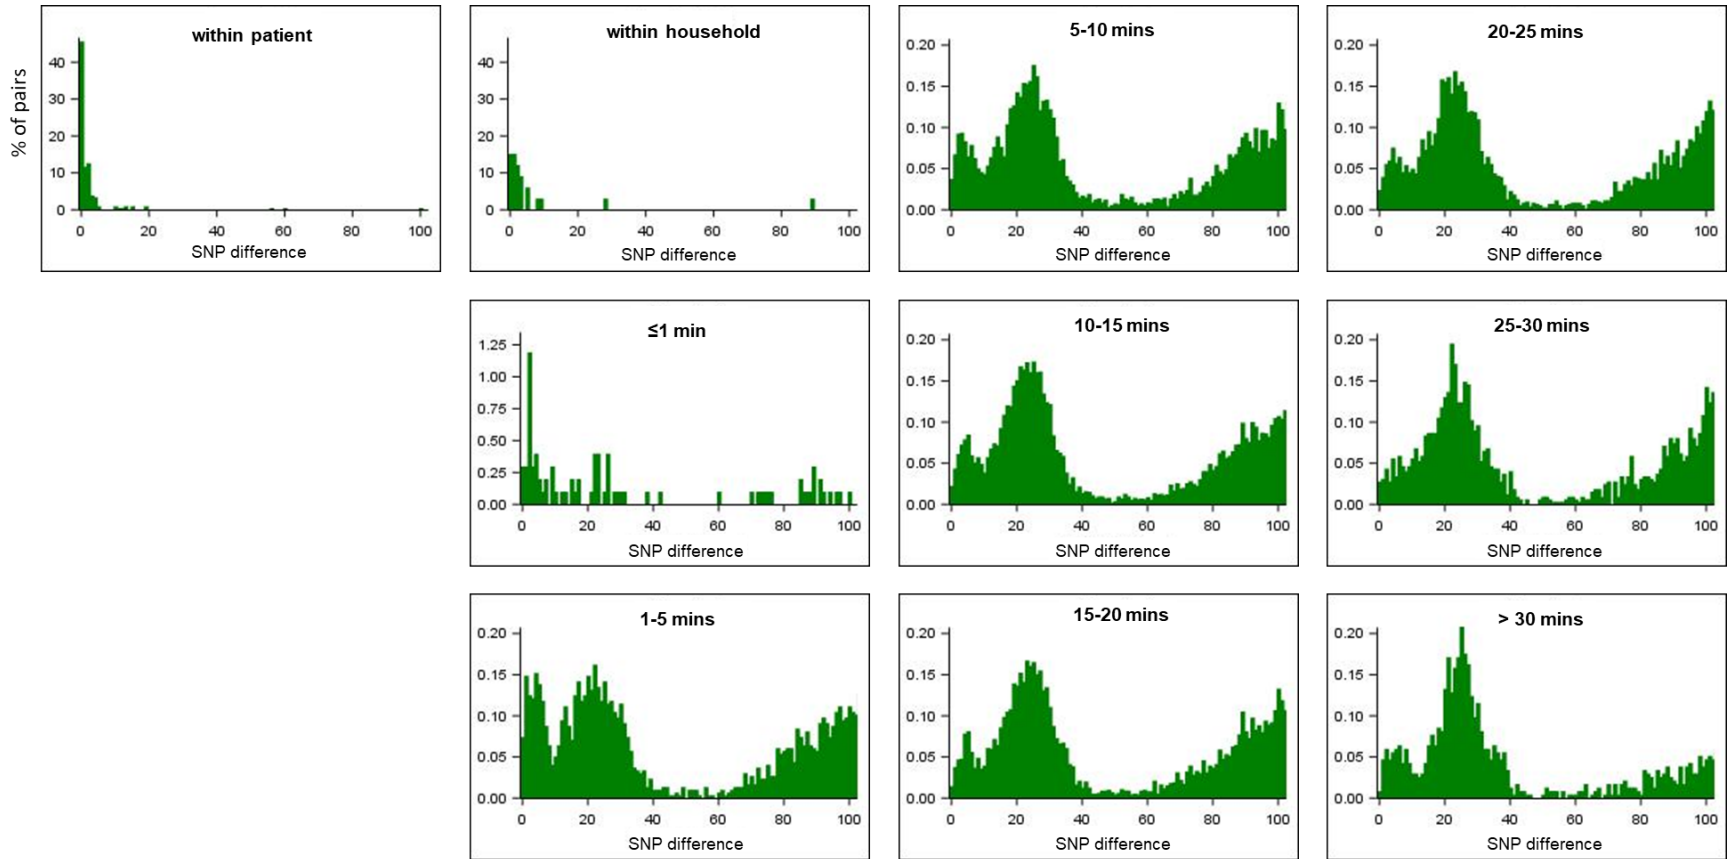

**B.**

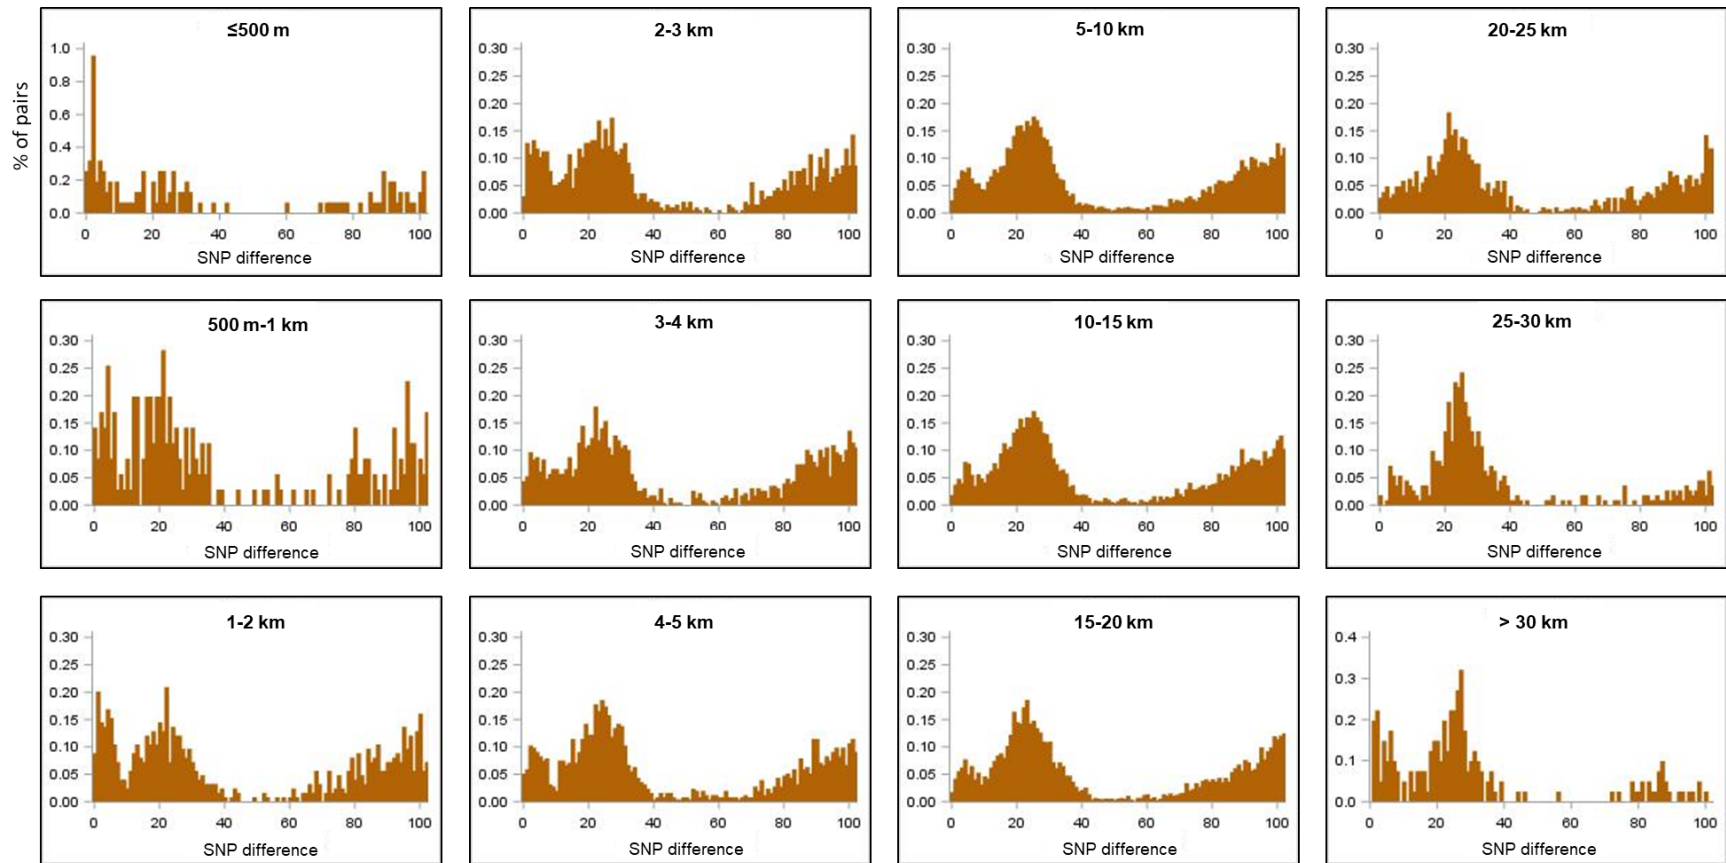

**Fig. S1.** Distributions of pairwise-SNP differences stratified by geographical proximity among drug-resistant isolates. (A) Using travel time in minutes (zoom between 0 and 100 SNP differences) and (B) using distances in kilometer (zoom between 0 and 100 SNP differences). Abbreviations: %, percentage; SNP, single-nucleotide polymorphism.

**A.**

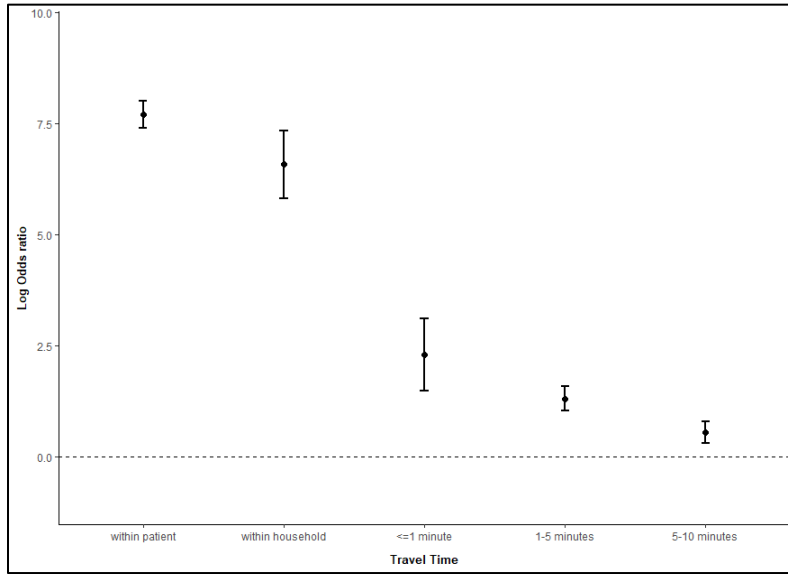

**B.**

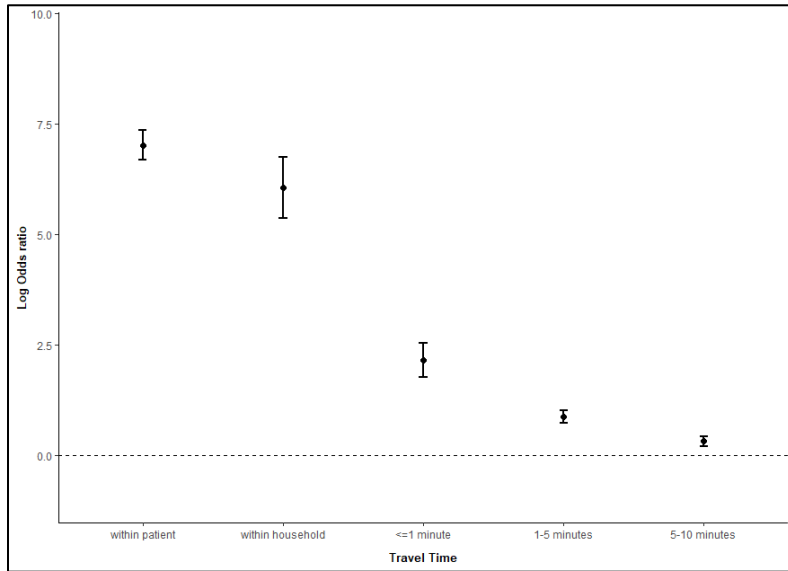

C.

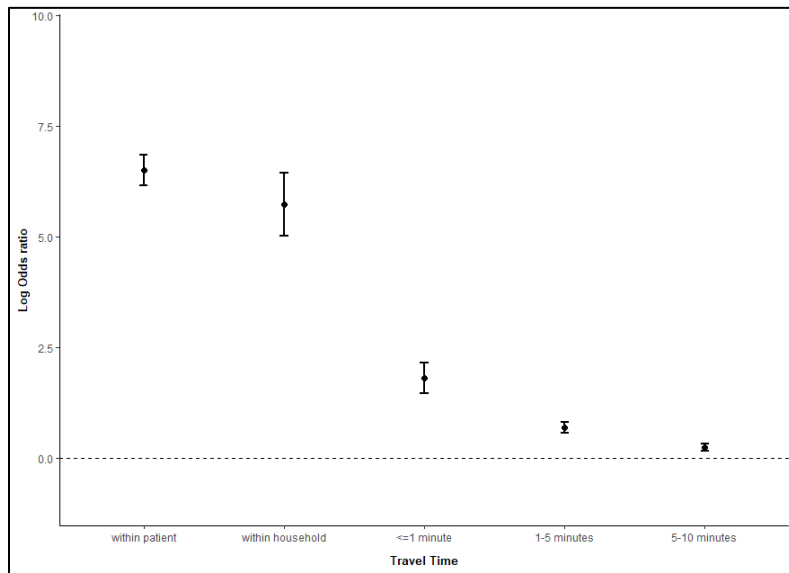

**Fig. S2.** Associations between pairwise geographical proximity (travel time between the places of residence) and SNP differences among drug-resistant isolates using pairs located 10 or more minutes apart as the reference category, measuring at a log odd ratio scale. (A)  $\leq 1$  SNP difference vs.  $> 1$  SNP difference. (B)  $\leq 5$  SNP difference vs.  $> 5$  SNP difference, and (C)  $\leq 10$  SNP difference vs.  $> 10$  SNP difference. Error bars are 95% confidence intervals.

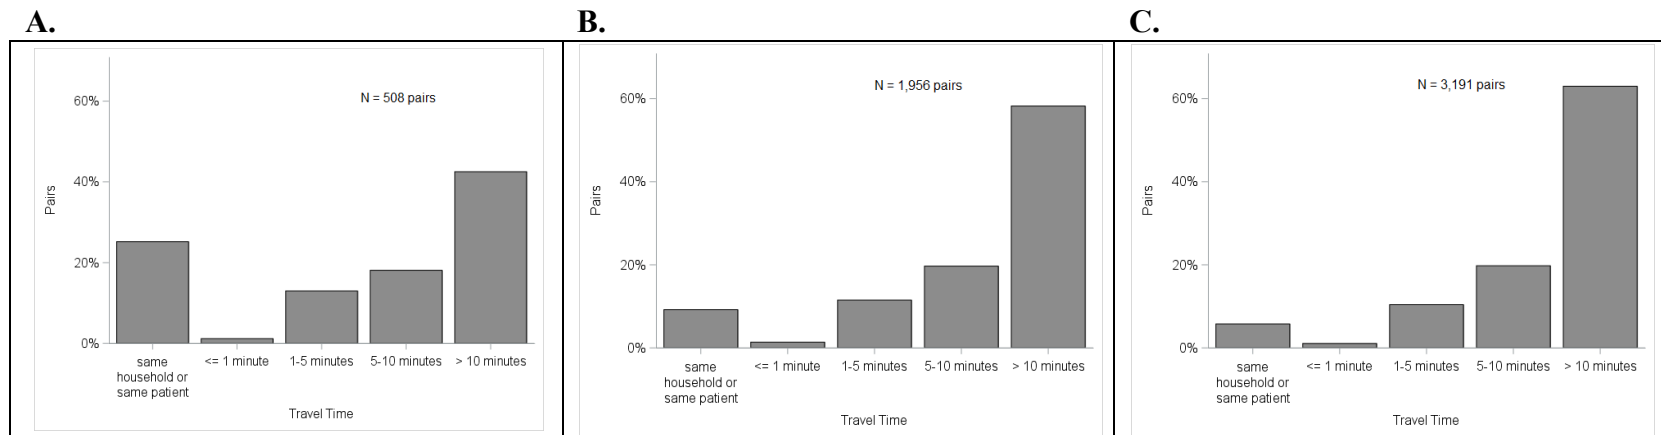

**Fig. S3.** Histograms by travel time for drug-resistant pairs with (A)  $\leq 1$  SNP difference, (B)  $\leq 5$  SNP difference, and (C)  $\leq 10$  SNP difference.

**Table S1.** Distribution of pairs across different spatial scales and different SNP different SNP cutoffs.

A. 1 SNP as the cutoff

|              | within patient | within household | ≤1 min       | 1-5 mins       | 5-10 mins      | > 10 mins        | Total            |
|--------------|----------------|------------------|--------------|----------------|----------------|------------------|------------------|
| ≤ 1 SNP      | 167            | 77               | 30           | 138            | 163            | 440              | 1,015            |
| %            | 55.85          | 40.31            | 0.54         | 0.08           | 0.03           | 0.02             |                  |
| > 1 SNP      | 132            | 114              | 5,493        | 174,305        | 535,212        | 2,259,608        | 2,974,864        |
| %            | 44.15          | 59.69            | 99.46        | 99.92          | 99.97          | 99.98            |                  |
| <b>Total</b> | <b>299</b>     | <b>191</b>       | <b>5,523</b> | <b>174,443</b> | <b>535,375</b> | <b>2,260,048</b> | <b>2,975,879</b> |

B. 5 SNPs as the cutoff

|              | within patient | within household | ≤1 min       | 1-5 mins       | 5-10 mins      | > 10 mins        | Total            |
|--------------|----------------|------------------|--------------|----------------|----------------|------------------|------------------|
| ≤ 5 SNPs     | 230            | 108              | 83           | 494            | 870            | 2,847            | 4,632            |
| %            | 76.92          | 56.54            | 1.5          | 0.28           | 0.16           | 0.13             |                  |
| > 5 SNPs     | 69             | 83               | 5,440        | 173,949        | 534,505        | 2,257,201        | 2,971,247        |
| %            | 23.08          | 43.46            | 98.5         | 99.72          | 99.84          | 99.87            |                  |
| <b>Total</b> | <b>299</b>     | <b>191</b>       | <b>5,523</b> | <b>174,443</b> | <b>535,375</b> | <b>2,260,048</b> | <b>2,975,879</b> |

C. 10 SNPs as the cutoff

|              | within patient | within household | ≤1 min       | 1-5 mins       | 5-10 mins      | > 10 mins        | Total            |
|--------------|----------------|------------------|--------------|----------------|----------------|------------------|------------------|
| ≤ 10 SNPs    | 240            | 117              | 102          | 773            | 1,574          | 5,373            | 8,179            |
| %            | 80.27          | 61.26            | 1.85         | 0.44           | 0.29           | 0.24             |                  |
| > 10 SNPs    | 59             | 74               | 5,421        | 173,670        | 533,801        | 2,254,675        | 2,967,700        |
| %            | 19.73          | 38.74            | 98.15        | 99.56          | 99.71          | 99.76            |                  |
| <b>Total</b> | <b>299</b>     | <b>191</b>       | <b>5,523</b> | <b>174,443</b> | <b>535,375</b> | <b>2,260,048</b> | <b>2,975,879</b> |

**Table S2.** Odd ratios and 95% confidence intervals of the associations between pairwise geographical proximity (travel time between the place of residence) and variants differences using pairs located 10 or more minutes apart as the reference category. (A)  $\leq 1$  SNP difference vs.  $> 1$  SNP difference. (B)  $\leq 5$  SNP difference vs.  $> 5$  SNP difference, and (C)  $\leq 10$  SNP difference vs.  $> 10$  SNP difference. Error bars are 95% confidence intervals.

A. 1 SNP as the cutoff

| <b>Travel Time</b> | <b>Odd ratio</b> | <b>95% CIs</b> |         |
|--------------------|------------------|----------------|---------|
| within patient     | 6497.03          | 5077.12        | 8314.86 |
| within household   | 3468.58          | 2559.84        | 4700.39 |
| $\leq 1$ minute    | 28.05            | 19.36          | 40.64   |
| 1-5 minutes        | 4.07             | 3.36           | 4.92    |
| 5-10 minutes       | 1.56             | 1.31           | 1.87    |

B. 5 SNPs as the cutoff

| <b>Travel Time</b> | <b>Odd ratio</b> | <b>95% CIs</b> |         |
|--------------------|------------------|----------------|---------|
| within patient     | 2642.82          | 2014.45        | 3467.19 |
| within household   | 1031.63          | 773.17         | 1376.64 |
| $\leq 1$ minute    | 12.10            | 9.71           | 15.07   |
| 1-5 minutes        | 2.25             | 2.05           | 2.48    |
| 5-10 minutes       | 1.29             | 1.20           | 1.39    |

C. 10 SNPs as the cutoff

| <b>Travel Time</b> | <b>Odd ratio</b> | <b>95% CIs</b> |         |
|--------------------|------------------|----------------|---------|
| within patient     | 1707.01          | 1282.29        | 2272.19 |
| within household   | 663.47           | 495.29         | 888.76  |
| $\leq 1$ minute    | 7.90             | 6.48           | 9.63    |
| 1-5 minutes        | 1.87             | 1.73           | 2.01    |
| 5-10 minutes       | 1.24             | 1.17           | 1.31    |
